# Supplementary material for: Enhanced C/EBPβ function promotes hyperplastic versus hypertrophic fat tissue growth and prevents steatosis in response to high-fat diet feeding
Source: eLife. 2022 Apr 22;11:e62625. doi: 10.7554/eLife.62625 (PMC9071262; doi:10.7554/eLife.62625)
Supplement: Figure 1—figure supplement 1—source data 1. [file elife-62625-fig1-figsupp1-data1.xlsx]

## Sheet: Sheet1
Figure 1 Supplement 1A
							food consumtion per mouse per week in different cages wt HFD (g)
	weeks	wt HFD	ΔuORF HFD		week		1	2	3	4	5	7	8	9	10	11	12	13	14	15	16	17	18
	1	0.590788	0.547858
	2	0.392119	0.36776		cage 1 (3 mice)		3.21467	2.1019	2.51643	2.63643	2.88286	2.32833	2.49143	2.705	2.865	2.62143	2.84571	2.69643	2.776	2.59857	2.89571	2.87071	2.49143
	3	0.411147	0.379979		cage 2 (1 mouse)		4.22	2.45429	2.59	2.28857	2.32857	2.21	2.36286	2.14	2.01571	2.57286	2.19143	2.21714	2.778	2.20714	2.30714	2.01429	2.20429
	4	0.402764	0.364177		cage 3 (2 mice)		3.449	2.44786	2.51929	2.78929	2.78571	2.26083	2.31714	2.30071	2.32143		2.46143	2.67143	2.561	2.25214	2.51286	2.62857	2.32786
	5	0.385768	0.347026		cage 4 (3mice)		3.47733	2.39857	2.40619	2.47857	2.69476	2.65444	2.36286	2.31905	2.53286	2.59381	2.61238	2.59476	2.86933	2.59048	2.76714	2.06619	2.54286
	7	0.350716	0.32802
	8	0.342859	0.384755		mean		3.59025	2.35065	2.50798	2.54821	2.67298	2.3634	2.38357	2.36619	2.43375	2.59603	2.52774	2.54494	2.74608	2.41208	2.62071	2.39494	2.39161
	9	0.33507	0.35766
	10	0.339849	0.374375		kcal		18.8129	12.3174	13.1418	13.3526	14.0064	12.3842	12.4899	12.3988	12.7529	13.6032	13.2453	13.3355	14.3895	12.6393	13.7325	12.5495	12.532
	11	0.355523	0.349579
	12	0.340301	0.348368		mean body weight		31.8438	31.4125	31.9638	33.1525	35.3575	35.3113	36.4288	37.0037	37.525	38.2625	38.9225	39.9113	40.33	40.8312	42.3875	43.125	43.2925
	13	0.334129	0.333383
	14	0.356793	0.354565		kcal/g body weight		0.590788	0.392119	0.411147	0.402764	0.396136	0.350716	0.342859	0.33507	0.339849	0.355523	0.340301	0.334129	0.356793	0.30955	0.323976	0.291003	0.289473
	15	0.30955	0.337697
	16	0.323976	0.329856
	17	0.291003	0.248334
	18	0.289473	0.294654				food consumtion per mouse per week in different cages ΔuORF HFD (g)
					week		1	2	3	4	5	7	8	9	10	11	12	13	14	15	16	17	18
					cage 1 (3 mice)		3.39067	2.27381	2.27667	2.29381	2.22714	2.16167	2.02524	2.16429	2.36714	2.16238	2.21524	2.20429	2.28	2.48286	2.42476	1.8781	2.20048
					cage 2 (4 mice)		2.586	1.71821	1.9675	1.97679	1.99571	1.62333	2.60357	2.30429	2.44429	2.36	2.40929	2.36357	2.541	2.35214	2.49714	1.78	2.18357
					mean		2.98833	1.99601	2.12208	2.1353	2.11143	1.8925	2.3144	2.23429	2.40571	2.26119	2.31226	2.28393	2.4105	2.4175	2.46095	1.82905	2.19202
					kcal		15.6589	10.4591	11.1197	11.189	11.0639	9.9167	12.1275	11.7077	12.6059	11.8486	12.1163	11.9678	12.631	12.6677	12.8954	9.58421	11.4862
					mean body weight		28.582	28.44	29.264	30.724	31.882	30.232	31.52	32.734	33.672	33.894	34.78	35.898	35.624	37.512	39.094	38.594	38.982
					kcal/g body weight		0.547858	0.36776	0.379979	0.364177	0.347026	0.32802	0.384755	0.35766	0.374375	0.349579	0.348368	0.333383	0.354565	0.337697	0.329856	0.248334	0.294654
Figure 1 Supplement 1B
						wt HFD	food intake		water	food intake		food intake		food intake		feces	energy feces	energy feces	energy feces	energy assimilation		energy efficiency
	wt HFD	ΔuORF HFD					wet (g/2 days)		g	dry (g/2 days)		dry (J/2 days)		dry (J/day)		dry (g/2 days)	(J/g)	(J/2days)	(J/day)	(J/day)
	94.38	96.28					6.98		0.102606	6.87739		169101		84550.7		0.656	14493	9507.41	4753.7	79797		94.3777
	94.09	94.74					5.88		0.086436	5.79356		142452		71226.1		0.585	14395	8421.07	4210.54	67015.5		94.0885
	94.13	92.84					5.55		0.081585	5.46842		134457		67228.7		0.555	14221	7892.66	3946.33	63282.4		94.13
	93.75	93.03					6.26		0.092022	6.16798		151658		75829.1		0.657	14426	9477.88	4738.94	71090.2		93.7505
mean	94.0875	94.2225
SEM	0.12951					ΔuORF HFD	food intake		water	food intake		food intake		food intake		feces	energy feces	energy feces	energy feces	energy assimilation		energy efficiency
							wet (g/2 days)		g	dry (g/2 days)		dry (J/2 days)		dry (J/day)		dry (g/2 days)	(J/g)	(J/2days)	(J/day)	(J/day)
							5.25		0.077175	5.17282		127189		63594.7		0.32	14784	4730.88	2365.44	61229.3		96.2804
							5.46		0.080262	5.37974		132277		66138.5		0.463	15022	6955.19	3477.59	62660.9		94.742
							5.01		0.073647	4.93635		121375		60687.5		0.589	14764	8696	4348	56339.5		92.8354
							5.86		0.086142	5.77386		141968		70983.8		0.631	15676	9891.56	4945.78	66038		93.0325
Figure 1 Supplement 1C
	wt ND	wt HFD	ΔuORF ND	ΔuORF HFD
	2.3929	2.17594	2.21743	1.80211
	1.65908	2.248	2.23699	2.04008
	1.56728	2.14827	1.71254	1.5199
	2.08415	1.44194	2.18973	1.51855
	1.91586		2.34649
mean	1.92385	2.00354	2.14064	1.72016
TTEST ND/HFD		0.745873		0.0398047
TTEST wt/ΔuORF			0.275561	0.257462
