# Supplementary material for: Enhanced C/EBPβ function promotes hyperplastic versus hypertrophic fat tissue growth and prevents steatosis in response to high-fat diet feeding
Source: eLife. 2022 Apr 22;11:e62625. doi: 10.7554/eLife.62625 (PMC9071262; doi:10.7554/eLife.62625)
Supplement: Figure 1—source data 1. [file elife-62625-fig1-data1.xlsx]

## Sheet: Sheet1
Figure 1A
week	0	1	2	3	4	5	6	7	8	9	10	11	12	13	14	15	16
wt #
996	27.5	31.14	30.45	30.44	30.96	33.13	33.92	32.01	33.84	35.34	37.12	37.46	38.86	39.8	40.39	41.66	43.8
998	29.7	32.01	31.61	32.12	32.98	35.19	34.64	33.46	34.48	35.75	36.78	37.9	38.97	39.98	39.13	39.22	40.89
1101	31.2	35.67	35.23	36.76	37.17	38.09	39.26	38.26	39.02	39.27	39.36	42.02	40.13	39.54	40.79	40.37	40.9
1122	27.9	32.12	31.55	31.8	35.07	38.08	39.91	37.69	38.38	39.59	39.95	39.33	40.08	41.68	41.76	41.37	42.84
1123	26.1	29.43	28.25	28.42	28.99	31.2	31.36	32.17	34.37	33.74	34.2	34.87	35.5	36.08	36.88	38.42	39.28
1124	28.9	32.33	31.48	32.52	33.82	37.11	37.28	38.28	39.22	39.87	40.37	41.61	43.63	44.34	44.62	46.33	48.64
1125	26.2	31.95	33.14	32.77	33.9	35.98	36.24	36.52	36.86	37.25	37.6	38.95	39.76	41.52	42.56	42.91	45.15
1253	33.47	32.07	33.84	35.11	34.64	37.11	37.67	38.04	40.89	43.35	44.48	44.94	47.17	46.83	47.36	48.14	47.67
1224	29.27	30.71	33.14	33.42	33.15	34.37	36.06	35.88	39.24	41.67	41.53	42.72	43.49	43.62	43.51	46.75	48.34
1225	29.76	31	32.41	32.96	33.6	34.61	36.64	37.71	39.07	41.09	41.83	43.15	43.59	44.85	44.07	46.85	48.22
Average	29	31.84	32.11	32.63	33.43	35.49	36.3	36	37.54	38.69	39.32	40.3	41.12	41.82	42.11	43.2	44.57	grams
SEM	0.712	0.509	0.611	0.726	0.704	0.707	0.8	0.8	0.787	0.974	0.941	0.979	1.053	0.998	0.948	1.119	1.119
ΔuORF #
1138	27.5	29.9	30.4	30.79	31.73	33.57	33.17	32.89	33.76	34.85	36.71	36.06	36.54	37.27	37.53	39.91	41.64
1139	26.3	30.29	30.31	31.32	32.49	33.46	33.27	33.21	34.01	35.53	36.97	37.24	38.38	39.87	39.63	42.09	44.43
1154	24.4	25.68	24.87	25.02	27.12	27.88	25.85	24.49	26.82	27.5	27.78	28.03	29.1	29.43	29.55	30.8	31.63
1157	25.5	25.52	24.84	26.22	27.56	28.32	27.59	24.9	26.24	27.8	27.53	28.31	29.38	31.03	30.08	30.65	32.21
1303	29.37	29.2	30.12	29.31	30.23	31.34	33.11	34.59	36.55	37	37.25	38.57	39.17	39.74	39.99	40.48	40.99
1255	28.87	30.54	30.65	30.91	32.18	33.42	34.08	33.89	35.18	36.36	37.53	38.37	39.97	40.92	40.91	42.39	44.17
1232	29.39	31.56	32.25	32.5	32.97	32.82	33.45	33.26	34.56	35.88	37.08	37.54	38.12	39.8	39.64	40.35	40.91
1231	30.73	32.34	32.86	32.64	33.83	34.41	35.2	34.48	35.16	36.72	38.96	40.47	40.39	42.22	42.49	43.28	43.22
mean	27.76	29.38	29.54	29.84	31.01	31.9	31.97	31.46	32.79	33.96	34.98	35.57	36.38	37.54	37.48	38.74	39.9	grams
SEM	0.778	0.892	1.079	0.998	0.882	0.886	1.181	1.493	1.399	1.397	1.616	1.676	1.614	1.674	1.743	1.796	1.805
TTEST	0.26	0.02	0.04425	0.03398	0.04555	0.00553	0.00638	0.01197	0.00664	0.01126	0.02682	0.02136	0.02147	0.035	0.02545	0.04323	0.03569
Figure 1B
	wt ND	wt HFD	ΔuORF ND	ΔuORF HFD
	0.834096	3.12427	0.503974	3.16125
	0.883563	3.01112	0.815668	3.53701
	1.31485	3.13272	0.5013	3.7038
	1.01728	3.0201	0.574934	4.05208
	0.902836		0.888275
mean	0.990526	3.07205	0.65683	3.61353
TTEST ND/HFD		1.7189e-07		9.8092e-07
TTEST wt/ΔuORF			0.022934	0.0279967
Figure 1C	wt ND	wt HFD	ΔuORF ND	ΔuORF HFD
	0.541387	1.69964	0.260989	1.49822
	0.553728	1.61936	0.502327	1.7891
	0.753	1.68318	0.359455	1.93684
	0.57723	1.49002	0.338792	2.06607
	0.549695		0.560223
mean	0.595008	1.62305	0.404357	1.82256
TTEST ND/HFD		6.80949e-07		8.8027e-06
TTEST wt/ΔuORF			0.0231697	0.178533
Figure 1D	wt ND	wt HFD	ΔuORF ND	ΔuORF HFD
	0.292708	1.42463	0.242985	1.66303
	0.329835	1.39177	0.313341	1.74791
	0.561854	1.44954	0.141846	1.76696
	0.440052	1.53008	0.236142	1.986
	0.353141		0.328053
mean	0.395518	1.449	0.252473	1.79098
TTEST ND/HFD		5.01812e-07		1.146e-07
TTEST wt/ΔuORF			0.040122	0.00382248
Figure 1E	wt ND	wt HFD	ΔuORF ND	ΔuORF HFD
	28.72	51.34	23.08	41.16
	27.6	42.08	24.11	32.87
	28.33	51.53	28.35	28.47
	27.16	41.37	25.11	37.48
	26.73		19.26	43.86
	24.87		21.21	30.61
	25.95
mean	27.0514	46.58	23.52	35.7417
TTEST ND/HFD		7.75636e-06		0.00141911
TTEST wt/ΔuORF			0.0205695	0.0219255
Figure 1F	wt ND	wt HFD	ΔuORF ND	ΔuORF HFD
	0.9	3.62	0.61	3.17
	0.63	2.47	0.58	1.69
	0.83	3.97	1.04	1.2
	0.8	2.35	0.67	1.88
	0.73		0.24	2.61
	0.66		0.59	0.85
	0.82
mean	0.767143	3.1025	0.621667	1.9
TTEST ND/HFD		2.65703e-05		0.00605732
TTEST wt/ΔuORF			0.188706	0.0590724
Figure 1G	wt ND	wt HFD	ΔuORF ND	ΔuORF HFD
	0.62	2.93	0.56	2.15
	0.63	2.42	0.49	1.62
	0.81	3.55	0.91	1.16
	0.78	2.28	0.63	1.89
	0.63		0.32	2.66
	0.74		0.5	1.01
	0.7
mean	0.701429	2.795	0.568333	1.74833
TTEST ND/HFD		3.98386e-06		0.00124312
TTEST wt/ΔuORF			0.125797	0.0276464
