# Supplementary material for: Enhanced C/EBPβ function promotes hyperplastic versus hypertrophic fat tissue growth and prevents steatosis in response to high-fat diet feeding
Source: eLife. 2022 Apr 22;11:e62625. doi: 10.7554/eLife.62625 (PMC9071262; doi:10.7554/eLife.62625)
Supplement: Figure 2—source data 1. [file elife-62625-fig2-data1.xlsx]

## Sheet: Sheet1
Figure 2A		wt	ΔuORF			wt	(area of 12 adjacent cells per mouse)							ΔuORF	(area of 12 adjacent cells per mouse)
		12791	6414			16536638	14866076	17549683	21057277	15047604	12841660	14301415		7732936	4520639	6862102	5675895
		13644	5372			10025881	13107678	12758006	6840353	9871121	8227329	11199540		6944920	6889708	5873317	7281207
		11666	6412			14187646	12954592	13256581	8257444	11761692	7427601	15953573		9264633	3958487	6352652	5583039
		9233	5347			9208585	15209056	15678352	10997099	11946567	4708023	20146290		4052179	8157060	3249105	2620866
		10602				18436411	16455494	15613939	9148355	10263457	16575955	7256111		3458239	7620004	4450370	6155230
		7897				9181816	16223774	17640029	6916477	11145165	7241890	15948553		6293258	2328079	5309492	4870311
		11285				19288841	11280684	4276371	6186182	10946906	8324367	7523802		7712859	4157583	4889551	7933705
						8848038	9697122	8884846	6586882	4171804	3180509	3723420		6366873	3237393	6471440	3753536
	mean	11016.9	5886.25			14192665	15143806	10991243	6404517	15597208	5145531	10842339		7827465	8971009	12008470	6486498
						12304604	15378873	6257287	8279194	7799022	5443338	5491020		2712885	7009333	6085797	4739811
	TTEST		0.000805506			9950592	3960160	8003974	3973545	10741955	6161086	6043134		8427261	2058714	8551905	3740988
						11326694	19450292	9075576	16150995	7932032	9480459	16990877		6169451	5553761	6890545	5325386
					mean	1.27907e+07	1.3644e+07	1.16655e+07	9.23319e+06	1.0602e+07	7896479	1.1285e+07		6.41358e+06	5.37181e+06	6.41623e+06	5347206
Figure 2B		wt	ΔuORF			wt	(area of 12 adjacent cells per mouse)				ΔuORF	(area of 12 adjacent cells per mouse)
		8233.67	2655.49			11259021	11846140	10265941	9690350		3070642	3274857	4165	2927	4269	4002	4442
		5625.05	3340.46			10760834	4919286	7667135	8257549		3411550	3408256	3818	2643	6258	1817	2958
		5523.49	3424.83			6160223	5670271	4925050	11211261		2243899	1302697	3503	6301	5400	3046	3416
		7359.85	3649.33			9085938	2648213	4298405	6452548		3260035	4946459	1711	3274	8018	1996	4124
			6058			9598124	5649685	9080998	5430647		1301873	4913521	3588	3056	3661	3971	7708
			3133.08			7556793	5430647	2800551	6040000		2562574	1466563	4515	5111	3147	1682	3566
			4449.33			5802023	4835294	3507894	6930148		2985827	3115108	1599	1678	9611	1818	4924
						8546579	6123168	5676035	7303171		1926871	5219844	4737	3697	4941	3781	4273
	mean	6685.52	3815.79			5937069	3658585	5005748	7040491		2118735	2131910	4112	3955	7402	3922	4539
						9864098	5461115	3239449	9778459		2800551	2321303	2692	4442	6055	2557	5261
	TTEST		0.00413195			9469666	3007236	5437235	3886680		3757399	4696131	1626	1873	6056	3732	3270
						4763654	8250961	4377456	6296916		2425881	3288856	5032	4835	7878	5273	4911
					mean	8233669	5625050	5523491	7359852		2655486	3340459	3424.83	3649.33	6058	3133.08	4449.33
