# Supplementary material for: Enhanced C/EBPβ function promotes hyperplastic versus hypertrophic fat tissue growth and prevents steatosis in response to high-fat diet feeding
Source: eLife. 2022 Apr 22;11:e62625. doi: 10.7554/eLife.62625 (PMC9071262; doi:10.7554/eLife.62625)
Supplement: Figure 3—source data 1. [file elife-62625-fig3-data1.xlsx]

## Sheet: Sheet1
Figure 3A	normalized (mean wt ND =1)					not normalized
	wt ND	wt HFD	ΔuORF ND	ΔuORF HFD		wt ND	wt HFD	ΔuORF ND	ΔuORF HFD
	0.892555	7.33466	0.868671	4.71452		0.204199	1.67803	0.198735	1.07859
	0.896961	7.02829	1.11724	6.14239		0.205207	1.60793	0.255603	1.40526
	1.18379	8.66178	1.11069	0.919633		0.270829	1.98165	0.254104	0.210394
	1.12948	6.60155	2.57201	2.16942		0.258403	1.51031	0.588425	0.496321
	0.89721		0.965695			0.205264		0.220932
mean	1	7.40657	1.32686	3.48649		0.22878	1.69448	0.30356	0.797641
TTEST ND/HFD		8.5738e-07		0.0906883
TTEST wt/ΔuORF			0.338787	0.0212656
Figure 3C	normalized (mean wt ND =1)					not normalized
	TNFalpha
	wt ND	wt HFD	ΔuORF ND	ΔuORF HFD		wt ND	wt HFD	kiki ND	kiki HFD
	0.91042	3.30932	1.1904	2.76084		0.5232	1.9018	0.6841	1.5866
	1.09748	3.09285	0.926777	3.14627		0.6307	1.7774	0.5326	1.8081
	1.50449	3.20857	0.819065	1.25618		0.8646	1.8439	0.4707	0.7219
	0.817324	3.00619	1.43297	1.29063		0.4697	1.7276	0.8235	0.7417
	0.670286	5.26902	1.79161			0.3852	3.028	1.0296
		3.44244	1.56644				1.9783	0.9002
mean	1	3.55473	1.28788	2.11348		0.57468	2.04283	0.740117	1.21457
TTEST ND/HFD		0.00014408		0.093384
TTEST wt/ΔuORF			0.211858	0.0387827
	MCP1
	wt ND	wt HFD	ΔuORF ND	ΔuORF HFD		wt ND	wt HFD	kiki ND	kiki HFD
	0.692065	3.33515	0.523346	3.25551		0.2416	1.1643	0.1827	1.1365
	1.28273	8.17932	0.537382	3.89516		0.4478	2.8554	0.1876	1.3598
	1.1057	4.46176	0.394729	1.94815		0.386	1.5576	0.1378	0.6801
	1.32111	5.80292	0.371527	2.81066		0.4612	2.0258	0.1297	0.9812
	0.598396	4.81381	1.33515			0.2089	1.6805	0.4661
		4.34403	0.444858				1.5165	0.1553
mean	1	5.15616	0.601165	2.97737		0.3491	1.80002	0.209867	1.0394
TTEST ND/HFD		0.000437545		0.000216959
TTEST wt/ΔuORF			0.0946041	0.0447965
	IL-1beta
	wt ND	wt HFD	ΔuORF ND	ΔuORF HFD		wt ND	wt HFD	kiki ND	kiki HFD
	1.71573	1.49115	1.05802	0.237686		1.0818	0.9402	0.6671	0.149866
	0.433293	1.48116	0.96127	1.95735		0.2732	0.9339	0.6061	1.23415
	1.58552	2.5073	0.786018	1.20869		0.9997	1.5809	0.4956	0.7621
	1.10655	3.66856	0.161137	0.714331		0.6977	2.3131	0.1016	0.4504
	0.158916	2.31523	0.86849			0.1002	1.4598	0.5476
		1.73523	0.65327				1.0941	0.4119
mean	1	2.19977	0.748034	1.02951		0.63052	1.387	0.47165	0.649129
TTEST ND/HFD		0.0307275		0.422634
TTEST wt/ΔuORF			0.44168	0.0531854
	IL-6
	wt ND	wt HFD	ΔuORF ND	ΔuORF HFD		wt ND	wt HFD	kiki ND	kiki HFD
	1.14044	2.00134	0.406009	2.51659		1.4303	2.51	0.5092	3.1562
	0.977706	1.68894	0.3545	1.0938		1.2262	2.1182	0.4446	1.3718
	1.41489	1.37566	0.590116	1.19052		1.7745	1.7253	0.7401	1.4931
	0.707406	0.907061	0.541717	0.84423		0.8872	1.1376	0.6794	1.0588
	0.759552	1.88533				0.9526	2.3645
		1.32615					1.6632
mean	1	1.53075	0.473085	1.41128		1.25416	1.9198	0.593325	1.76998
TTEST ND/HFD		0.0374635		0.048384
TTEST wt/ΔuORF			0.0113823	0.750053
