# Supplementary material for: Enhanced C/EBPβ function promotes hyperplastic versus hypertrophic fat tissue growth and prevents steatosis in response to high-fat diet feeding
Source: eLife. 2022 Apr 22;11:e62625. doi: 10.7554/eLife.62625 (PMC9071262; doi:10.7554/eLife.62625)
Supplement: Figure 4—source data 1. [file elife-62625-fig4-data1.xlsx]

## Sheet: Sheet1
Figure 4A	normalized (mean wt ND =1)					not normalized
	wt ND	wt HFD	ΔuORF ND	ΔuORF HFD		wt ND	wt HFD	ΔuORF ND	ΔuORF HFD
	0.692505	7.97748	1.0525	6.07922		0.2624	3.02278	0.3988	2.3035
	1.45442	4.19752	0.442317	4.44349		0.5511	1.5905	0.1676	1.6837
	1.32167	30.1174	1.45389	2.79668		0.5008	11.4119	0.5509	1.0597
	0.848477	3.61401	0.761914	3.75336		0.3215	1.3694	0.2887	1.4222
	1.07465			2.78902		0.4072			1.0568
	0.523602					0.1984
	1.08468					0.411
mean	1	11.4766	0.927656	3.97235		0.378914	4.34864	0.3515	1.50518
TTEST ND/HFD		0.0469748		0.00387248
TTEST wt/ΔuORF			0.761304	0.219622
Figure 4C	normalized (mean wt ND =1)					not normalized
	TNFalpha
	wt ND	wt HFD	ΔuORF ND	ΔuORF HFD		wt ND	wt HFD	ΔuORF ND	ΔuORF HFD
	1.02239	9.06518	0.649945	3.10477		0.8485	7.52335	0.5394	2.5767
	1.26025	3.70229	0.262436	3.14513		1.0459	3.07259	0.2178	2.6102
	1.02528	5.59863	0.618255	1.47268		0.8509	4.6464	0.5131	1.2222
	1.40412	1.97789	0.305452	3.42167		1.1653	1.64148	0.2535	2.8397
	0.481614		0.291354	1.9326		0.3997		0.2418	1.6039
	0.806346					0.6692
mean	0.999999	5.086	0.425488	2.61537		0.829917	4.22096	0.35312	2.17054
TTEST ND/HFD		0.00977251		0.000526931
TTEST wt/ΔuORF			0.00739958	0.121602
	MCP1
	wt ND	wt HFD	ΔuORF ND	ΔuORF HFD		wt ND	wt HFD	ΔuORF ND	ΔuORF HFD
	1.01937	14.1957	0.791795	5.43875		0.25796	3.59234	0.20037	1.37632
	0.942511	7.65309	0.336128	3.44808		0.23851	1.93668	0.08506	0.872564
	1.43062	19.5758	1.31057	10.5317		0.36203	4.95381	0.33165	2.66514
	0.774803	4.14131	0.709126	16.9485		0.19607	1.04799	0.17945	4.28896
	1.09153		0.585202	2.31848		0.27622		0.14809	0.58671
	0.741174					0.18756
mean	1	11.3915	0.746564	7.73711		0.253058	2.8827	0.188924	1.95794
TTEST ND/HFD		0.00505319		0.0323431
TTEST wt/ΔuORF			0.201736	0.423106
	IL-1beta
	wt ND	wt HFD	ΔuORF ND	ΔuORF HFD		wt ND	wt HFD	ΔuORF ND	ΔuORF HFD
	1.45571	9.2575	0.788739	5.96979		0.318	2.0223	0.1723	1.3041
	0.51133	2.35019	1.40124	2.89128		0.1117	0.5134	0.3061	0.6316
	1.60632	6.12909	2.68483	4.22019		0.3509	1.3389	0.5865	0.9219
	0.616159	3.73403	4.52277	7.28176		0.1346	0.8157	0.988	1.5907
	0.813916		0.466926	5.01488		0.1778		0.102	1.0955
	0.996567					0.2177
mean	1	5.3677	1.9729	5.07558		0.21845	1.17257	0.43098	1.10876
TTEST ND/HFD		0.00712411		0.0185296
TTEST wt/ΔuORF			0.197554	0.858242
	IL-6
	wt ND	wt HFD	ΔuORF ND	ΔuORF HFD		wt ND	wt HFD	ΔuORF ND	ΔuORF HFD
	2.55249	0.848607	0.829897	1.46124		1.7599	0.5851	0.5722	1.0075
	0.498344	1.19379	0.8605	2.39701		0.3436	0.8231	0.5933	1.6527
	0.630472	1.57248	2.96004	1.70911		0.4347	1.0842	2.0409	1.1784
	0.550412	0.671663	1.74537	2.35017		0.3795	0.4631	1.2034	1.6204
	0.44149		1.31359	1.40308		0.3044		0.9057	0.9674
	1.32679					0.9148
mean	1	1.07164	1.54188	1.86412		0.689483	0.738875	1.0631	1.28528
TTEST ND/HFD		0.877569		0.491438
TTEST wt/ΔuORF			0.319617	0.0330989
