# Supplementary material for: Enhanced C/EBPβ function promotes hyperplastic versus hypertrophic fat tissue growth and prevents steatosis in response to high-fat diet feeding
Source: eLife. 2022 Apr 22;11:e62625. doi: 10.7554/eLife.62625 (PMC9071262; doi:10.7554/eLife.62625)
Supplement: Figure 5—figure supplement 1—source data 1. [file elife-62625-fig5-figsupp1-data1.xlsx]

## Sheet: Sheet1
Figure 5 Supplement 1C
	wt ND	wt HFD	ΔuORF ND	ΔuORF HFD
	0.1755	0.2772	0.2	0.208
	0.1977	0.2921	0.2624	0.1977
	0.178	0.233	0.1977	0.2255
	0.1975		0.2167	0.2009
mean	0.187175	0.267433	0.2192	0.208025
TTEST ND/HFD		0.00459033		0.517167
TTEST wt/ΔuORF			0.0951059	0.0157713
Figure 5 Supplement 1D
	wt ND	wt HFD	ΔuORF ND	ΔuORF HFD
	0.16	0.21	0.16	0.18
	0.17	0.19	0.18	0.14
	0.2	0.18	0.17	0.15
	0.19	0.17	0.18	0.16
	0.18		0.14	0.17
	0.16		0.14	0.15
	0.14
mean	0.171429	0.1875	0.161667	0.158333
TTEST ND/HFD		0.217215		0.735706
TTEST wt/ΔuORF			0.386742	0.0202619
