# Supplementary material for: Enhanced C/EBPβ function promotes hyperplastic versus hypertrophic fat tissue growth and prevents steatosis in response to high-fat diet feeding
Source: eLife. 2022 Apr 22;11:e62625. doi: 10.7554/eLife.62625 (PMC9071262; doi:10.7554/eLife.62625)
Supplement: Figure 5—source data 1. [file elife-62625-fig5-data1.xlsx]

## Sheet: Sheet1
Figure 5B
	wt ND	wt HFD	ΔuORF ND	ΔuORF HFD
	1.533	1.883	1.242	1.496
	1.316	1.459	1.672	1.271
	1.314	1.583	0.933	1.388
	1.399	2.231	1.302	0.846
	1.262		1.198
	1.318		0.906
mean	1.357	1.789	1.20883	1.25025
TTEST ND/HFD		0.0174874		0.825619
TTEST wt/ΔuORF			0.248719	0.0524401
Figure 5D
	wt ND	wt HFD	ΔuORF ND	ΔuORF HFD
	1.17	1.84	1.01	1.22
	1.5	1.25	0.99	1.01
	1.52	1.39	1.38	0.98
	1.47	1.41	1.11	1.23
	1.37		0.95	1.17
	1.29		0.82	1.37
	1.25
mean	1.36714	1.4725	1.04333	1.16333
TTEST ND/HFD		0.385309		0.248636
TTEST wt/ΔuORF			0.00430615	0.0392063
