# Supplementary material for: Enhanced C/EBPβ function promotes hyperplastic versus hypertrophic fat tissue growth and prevents steatosis in response to high-fat diet feeding
Source: eLife. 2022 Apr 22;11:e62625. doi: 10.7554/eLife.62625 (PMC9071262; doi:10.7554/eLife.62625)
Supplement: Figure 6—source data 1. [file elife-62625-fig6-data1.xlsx]

## Sheet: Sheet1
Figure 6A								data from single wt ND mice									data from single ΔuORF ND mice
	time (min)	wt ND	wt HFD	ΔuORF ND	ΔuORF HFD		min	0	15	30	60	90	120	150		min	0	15	30	60	90	120	150
	0	5.1	6.35556	4.9	5.7
	15	15.4	18.6556	15	20.3			6	17	16.6	13.9	12.2	9.6	8.7			4.3	14.3	19.7	16.7	12.3	8.8	7.7
	30	20.2	25.4333	18.9	21.6			5	15	21.5	20.8	14.3	11.3	8.5			4.9	12.5	18.5	14.5	11.8	11.1	8.9
	60	19.2	21.4556	14.6	16.5			5	14.6	21.5	22.3	15	11.9	9.6			4.6	15.7	20.9	16.1	11.4	10.7	9
	90	13.6	16.3111	10.7	11.7			4.8	15.8	19.6	23.8	15.8	12	11.7			6.3	17	19.2	14.2	11.5	8.9	8
	120	10.7	12.5667	9.1	9.3			4.7	14.4	22.2	18.5	13	10.2	7.7			5.7	18.3	22.2	15.9	9.5	9	7
	150	9.2	9.96667	7.7	7.9			5.3	15.5	19.5	15.6	11.2	8.9	8.7			3.6	12.3	12.7	10.3	7.8	6.3	5.8
							mean	5.13333	15.3833	20.15	19.15	13.5833	10.65	9.15		mean	4.9	15.0167	18.8667	14.6167	10.7167	9.13333	7.73333
	AUC	wt ND	wt HFD	ΔuORF ND	ΔuORF HFD
		1875	2615	1940	2233
		2266	2600	1896	2374			data from single wt HFD mice									data from single ΔuORF HFD mice
		2360	2214	2021	1400		min	0	15	30	60	90	120	150		min	0	15	30	60	90	120	150
		2438	2615	1892	1508
		2117	2153	1954	2429			6.2	20.6	25.5	22.3	17.3	11.8	9.6			5.7	21.5	23.6	17.2	12.7	10.7	7.9
		1913	2462	1316	2072			7.5	17.6	21	19	19.5	16.8	9.9			5.9	19.4	25	19.3	13.3	11.4	10.4
			2721		2516			5.4	16.9	27	19	11	9.8	7.9			4.3	15.4	15.6	10.7	7	5.5	6
			3090					5.6	17.4	24	22.6	18.5	13.2	9.5			5.5	15	15.4	11.1	7.7	7.6	6.9
			2564					4.9	15.5	25.5	18.7	12.3	9.2	6.9			6.9	24	24.3	20.7	13.5	10.6	8.4
								6.6	18.6	26.4	21.2	14.9	10.5	9.4			5.7	23.5	22.5	14.4	12.3	8.9	6.8
	mean	2161.5	2559.33	1836.5	2076			6.4	21.3	28.4	22.6	16.2	12.2	12.3			6	23	25.1	21.9	15.1	10.6	8.9
								8.5	20.1	26.5	24.9	20.6	18.4	14.1
	TTEST ND/HFD		0.0124586		0.275411			6.1	19.9	24.6	22.8	16.5	11.2	10.1
	TTEST wt/ΔuORF			0.0456586	0.0186797
							mean	6.35556	18.6556	25.4333	21.4556	16.3111	12.5667	9.96667		mean	5.71429	20.2571	21.6429	16.4714	11.6571	9.32857	7.9
Figure 6B								data from single wt ND mice									data from single ΔuORF ND mice
	time (min)	wt ND	wt HFD	ΔuORF ND	ΔuORF HFD		min	0	15	30	60	90	120	150		min	0	15	30	60	90	120	150
	0	3.6	4	4	4
	15	11.8	16.9	13.9	17			4.4	15.3	16.8	11.3	7.5	6.4	6.3			4.3	10.1	9.2	7.5	7.6	6.9	5.8
	30	12.9	24.9	14.1	22.6			4.2	16	19	13	10.7	7.7	6.8			4.3	13.8	13.8	9.7	6.9	6.2	6
	60	10.1	19.7	8.8	14.2			3.8	9.9	9.5	7	6.3	6.4	7.3			3.3	12.7	14.5	7.4	6.5	5.3	6.4
	90	8.1	12.3	6.9	9.7			2.9	9.4	10	9.5	9.3	6.2	5.4			4.7	15.1	13.7	8.7	7	6.3	6.2
	120	6.4	9.3	6.3	8			3.7	9.7	10.8	9.7	8.5	6.8	7.3			3.9	15.6	13.3	8.7	6.2	5.7	5.3
	150	6.2	7.4	6.1	6.9			3.4	11.1	10.8	9.6	7.3	6.3	5.9			3.6	16.3	19.9	10.5	7.3	7.1	6.7
								2.8	11.3	13.5	10.4	6.9	4.9	4.6
																	4.01667	13.9333	14.0667	8.75	6.91667	6.25	6.06667
	AUC	wt ND	wt HFD	ΔuORF ND	ΔuORF HFD		mean	3.6	11.8143	12.9143	10.0714	8.07143	6.38571	6.22857
		1491	2263.5	1137.8	1785.8
		1743	2244	1323.8	2236.5
		1091.3	2065.5	1213.5	1742.3			data from single wt HFD mice									data from single ΔuORF HFD mice
		1218.8	3033	1323	1864.5		min	0	15	30	60	90	120	150		min	0	15	30	60	90	120	150
		1275.8	1903.5	1260	1794.8
		1219.5	2121	1566.8	1689.8			4.2	14	21.4	22.3	13.9	10.9	8.5			3.8	17.3	22.3	15	8.5	6.7	6
		1229.3						4.1	15.5	25.9	22.5	12.1	8.2	7.6			4.7	16.9	24.9	18.1	12.6	11.3	8.5
								3.7	15.6	27.1	19	9	8.4	6.8			3.1	19.7	22.4	12.2	8.6	6.8	6.1
	mean	1324.1	2271.75	1304.15	1852.28			3.9	14.3	25.1	31	23.4	14.9	9.7			3.8	16.9	22.8	14.7	9.9	7.4	7.3
								3.7	17.3	25.5	13.9	9.7	7.9	6.5			4.3	17.1	24	11.3	9.1	8.7	6.2
	TTEST ND/HFD		0.000198996		0.000274154			4	17.7	27.8	18.7	9.5	8.5	6.6			4	14.2	18.9	13.7	9.5	7.2	7.3
	TTEST wt/ΔuORF			0.853984	0.0422991			4.4	23.7	21.4	10.7	8.3	6.2	6
																	3.95	17.0167	22.55	14.1667	9.7	8.01667	6.9
								4	16.8714	24.8857	19.7286	12.2714	9.28571	7.38571
Figure 6C	time (min)	wt ND	wt HFD	ΔuORF ND	ΔuORF HFD			data from single wt ND mice									data from single ΔuORF ND mice
	0	7.45	8.4125	6.88	8.51429		min	0	15	30	60	90	120			min	0	15	30	60	90	120
	15	7.18333	7.1	5.52	5.17143
	30	5.88333	5.4625	4.68	4.44286			7.3	5.4	4.9	4.1	3.8	5.1				7.3	5.8	5.2	3.6	3.4	4.8
	60	3.98333	3.7125	3.28	3.12857			6.4	7.4	5.5	4	5	6.8				6	4.8	4.6	2.9	2.8	4
	90	3.98333	3.825	2.98	2.5			7.6	7.1	8.4	4.2	3.7	7.5				6.9	5.1	5.2	3.2	2.7	3.7
	120	6.08333	4.9375	4.08	3.3			6.8	6.8	5.5	3.5	3.7	7				7.2	6.6	4.1	3.6	3.1	3.9
								7.4	7.5	5.5	4.2	3.6	3.7				7	5.3	4.3	3.1	2.9	4
								9.2	8.9	5.5	3.9	4.1	6.4
	AUC	wt ND	wt HFD	ΔuORF ND	ΔuORF HFD
		559.5	606	540.8	525		mean	7.45	7.18333	5.88333	3.98333	3.98333	6.08333			mean	6.88	5.52	4.68	3.28	2.98	4.08
		654.8	561	451.5	465.8
		702	585.8	477.8	289.5
		597.8	534	504.8	502.5			data from single wt HFD mice									data from single ΔuORF HFD mice
		581.3	636.8	468.8	482.3		min	0	15	30	60	90	120			min	0	15	30	60	90	120
		662.3	595.5		457.5
			639		495.8			10.4	7.9	6	3.4	3.3	4.9				8.7	7.8	6.1	3.6	2.2	2.1
			583.5					7.5	6.3	6.3	3.7	3.4	3.7				8.9	6.5	4.6	2.9	2.3	2.8
								8.8	6.8	5.7	4.4	3.6	3.3				10.4	3.6	3.2	1.7	0.8	0.7
	mean	626.283	592.7	488.74	459.771			7.3	7.5	5.5	3.1	2.8	4.4				8.3	5.3	4.1	3.4	3.2	4.7
								9.4	8.5	5.1	3.3	4.3	6.4				7.9	3.8	4	3.2	3.5	5
	TTEST ND/HFD		0.189583		0.461782			8.9	6.9	4.1	3.5	4.8	5.6				6.9	4.5	4.1	3.5	2.6	4.2
	TTEST wt/ΔuORF			0.000950653	0.000819177			8.3	7.2	5.5	4.1	4.3	6.2				8.5	4.7	5	3.6	2.9	3.6
								6.7	5.7	5.5	4.2	4.1	5
							mean	8.4125	7.1	5.4625	3.7125	3.825	4.9375			mean	8.51429	5.17143	4.44286	3.12857	2.5	3.3
Figure 6D	time (min)	wt ND	wt HFD	ΔuORF ND	ΔuORF HFD			data from single wt ND mice									data from single ΔuORF ND mice
	0	6.7	6.1	6.6	5.8		min	0	15	30	60	90	120			min	0	15	30	60	90	120
	15	5.3	6.5	5.4	4.9
	30	4.1	4.2	3.5	3.3			7.9	5.6	4.4	2.7	3.1	5.8				6.7	5.2	3.8	2.8	3.1	5.6
	60	2.7	2.5	2.6	1.6			6.5	5	3.8	2.9	3.5	9.4				5.6	5	3.4	2.9	2.7	4.8
	90	3.1	2.4	2.2	1.2			6.7	4.2	3.2	2.2	3.1	5.5				6.5	5.2	3.7	2.3	2.6	3.6
	120	5.7	3.6	3.3	1.6			6.2	5.7	4.4	2.7	2.9	5.5				7.1	5	4.1	3.2	2.7	4.2
								5.9	5.5	4.7	3.2	4.2	5.5				7.1	6.1	3.4	1.8	0.9	0.7
								6.8	6.2	3.9	2.7	3.1	4.7				6.8	5.8	2.8	2.3	1.2	1.1
	AUC	wt ND	wt HFD	ΔuORF ND	ΔuORF HFD			6.6	5	4.1	2.4	2.1	3.6
		503.25	363	474.75	213											mean	6.63333	5.38333	3.53333	2.55	2.2	3.33333
		542.25	387.75	433.5	304.5		mean	6.65714	5.31429	4.07143	2.68571	3.14286	5.71429
		426.75	753.75	411	210
		481.5	354.75	460.5	254.25
		537	402.75	312.75	356.25			data from single wt HFD mice									data from single ΔuORF HFD mice
		476.25	381	322.5	453		min	0	15	30	60	90	120			min	0	15	30	60	90	120
		405.75	423.75		312.75
								6.1	5.8	4.5	2.5	1.3	1				4.2	4.4	3	0.8	0.5	0.6
	mean	481.821	438.107	402.5	300.536			5.7	5.2	3.4	2.7	1.8	3.7				6.2	7.2	3.6	1.1	0.8	0.8
								5.9	6.4	3.6	3.6	8.3	11.7				3.8	3.7	2.4	0.9	0.9	1.2
	TTEST ND/HFD		0.456373		0.0405075			5.6	6.7	3.9	1.8	1.2	2.3				4.3	4.2	2.6	1.7	0.9	1.5
	TTEST wt/ΔuORF			0.0376795	0.0479958			6.9	7.1	4.2	2.3	1.6	2.2				7.9	4.9	3.4	2.2	1.6	2.2
								6.4	7	5.4	2.2	0.9	0.9				7	5.3	4	2.8	2.9	4
								5.9	7.5	4.2	2.4	1.7	3.3				7.5	4.8	4.4	1.8	0.5	1.1
							mean	6.07143	6.52857	4.17143	2.5	2.4	3.58571			mean	5.84286	4.92857	3.34286	1.61429	1.15714	1.62857
