# Supplementary material for: Enhanced C/EBPβ function promotes hyperplastic versus hypertrophic fat tissue growth and prevents steatosis in response to high-fat diet feeding
Source: eLife. 2022 Apr 22;11:e62625. doi: 10.7554/eLife.62625 (PMC9071262; doi:10.7554/eLife.62625)
Supplement: Figure 7—source data 1. [file elife-62625-fig7-data1.xlsx]

## Sheet: Sheet1
Figure 7A	C/EBPα	normalized (mean wt ND =1)					C/EBPα	not normalized
	wt ND	wt HFD	ΔuORF ND	ΔuORF HFD			wt ND	wt HFD	ΔuORF ND	ΔuORF HFD
	1.14956	0.478214	1.05898	0.775422			1.43548	0.597153	1.32236	0.968282
	1.0742	0.797728	0.94073	0.561703			1.34138	0.996135	1.1747	0.701408
	0.941579	0.562018	1.26713	1.12641			1.17576	0.701801	1.58229	1.40657
	0.959171	0.52041	1.07833	1.06893			1.19773	0.649844	1.34653	1.33478
	0.875482	0.765144	1.06838				1.09323	0.955447	1.3341
		0.505089	1.45871					0.630713	1.82152
		0.518377						0.647305
mean	1	0.592426	1.14538	0.883115			1.24872	0.739771	1.43025	1.10276
TTEST ND/HFD		0.000217579		0.0998074
TTEST wt/ΔuORF			0.160055	0.0345668
	PPARγ	normalized (mean wt ND =1)					PPARγ	not normalized
	wt ND	wt HFD	ΔuORF ND	ΔuORF HFD			wt ND	wt HFD	ΔuORF ND	ΔuORF HFD
	0.860491	0.326516	1.38299	0.737602			1.23521	0.468705	1.98525	1.05881
	1.15247	0.568075	1.51259	0.591936			1.65434	0.815458	2.17128	0.849709
	0.903803	0.569945	1.54366	1.31465			1.29739	0.818141	2.21589	1.88715
	0.84548	0.335389	0.873574	1.38289			1.21367	0.481442	1.25399	1.9851
	1.23775	0.613084	0.926786				1.77676	0.880066	1.33038
		0.385631	1.26217					0.553563	1.81182
		0.429643						0.616742
mean	0.999999	0.461183	1.2503	1.00677			1.43547	0.662017	1.79477	1.44519
TTEST ND/HFD		9.97346e-05		1.29407
TTEST wt/ΔuORF			0.129312	0.00709813
	SREBP1c	normalized (mean wt ND =1)					SREBP1c	not normalized
	wt ND	wt HFD	ΔuORF ND	ΔuORF HFD			wt ND	wt HFD	ΔuORF ND	ΔuORF HFD
	0.821836	0.256969	1.38487	0.55816			1.09668	0.342906	1.84801	0.744822
	1.17607	0.415086	1.47881	0.420968			1.56938	0.553901	1.97337	0.56175
	0.904263	0.535491	1.6231	0.998599			1.20667	0.714573	2.16591	1.33255
	1.02142	0.340091	0.771126	1.11118			1.36301	0.453825	1.02901	1.48279
	1.07641	0.528807	1.25133				1.43639	0.705654	1.66981
		0.321163	1.78708					0.428567	2.38473
		0.27602						0.368328
mean	1	0.381947	1.38272	0.772226			1.33442	0.509679	1.84514	1.03048
TTEST ND/HFD		7.41364e-06		0.0256771
TTEST wt/ΔuORF			0.0496679	0.0174904
	FAS	normalized (mean wt ND =1)					FAS	not normalized
	wt ND	wt HFD	ΔuORF ND	ΔuORF HFD			wt ND	wt HFD	ΔuORF ND	ΔuORF HFD
	1.09062	0.210825	1.66564	0.35143			1.76143	0.340497	2.69011	0.567582
	1.06846	0.343314	1.60748	0.297627			1.72564	0.554475	2.59618	0.480688
	0.906127	0.325694	1.2438	0.866573			1.46345	0.526016	2.00882	1.39957
	1.04642	0.308681	1.50793	0.641184			1.69003	0.49854	2.43541	1.03555
	0.88837	0.396938	1.53568				1.43478	0.641081	2.48022
		0.241683	1.45963					0.390334	2.35739
		0.268921						0.434325
mean	1	0.299437	1.50336	0.539204			1.61507	0.48361	2.42802	0.870849
TTEST ND/HFD		2.77862e-08		7.03757e-05
TTEST wt/ΔuORF			0.000102154	0.0422713
Figure 7B	C/EBPα						C/EBPα	not normalized
	wt ND	wt HFD	ΔuORF ND	ΔuORF HFD			wt ND	wt HFD	ΔuORF ND	ΔuORF HFD
	0.745276	1.03156	0.881493	0.93818			0.72691	1.00614	0.85977	0.91506
	0.76128	1.00683	1.88918	1.5776			0.74252	0.98202	1.84263	1.53872
	0.831511	0.642575	1.15598	0.986654			0.81102	0.62674	1.12749	0.96234
	1.35774	0.957977	0.816286	1.32678			1.32428	0.93437	0.79617	1.29408
	0.917418		1.04208	1.08429			0.89481		1.0164	1.05757
	1.38677						1.3526
mean	1	0.909736	1.157	1.1827			0.975357	0.887317	1.12849	1.15355
TTEST ND/HFD		0.602621		0.912467
TTEST wt/ΔuORF			0.491382	0.912467
	PPARγ						PPARγ	not normalized
	wt ND	wt HFD	ΔuORF ND	ΔuORF HFD			wt ND	wt HFD	ΔuORF ND	ΔuORF HFD
	1.15456	1.03548	1.132	1.19432			1.1616	1.0418	1.1389	1.2016
	1.11798	1.22592	1.62529	1.61555			1.1248	1.2334	1.6352	1.6254
	0.548554	1.15694	1.5567	1.38734			0.5519	1.164	1.5662	1.3958
	1.21787	1.19909	1.51098	1.43733			1.2253	1.2064	1.5202	1.4461
	0.656297		1.08399	1.31319			0.6603		1.0906	1.3212
	1.30474						1.3127
mean	1	1.15436	1.38179	1.38954			1.0061	1.1614	1.39022	1.39802
TTEST ND/HFD		0.376301		0.955023
TTEST wt/ΔuORF			0.0578337	0.0309148
	SREBP1c						SREBP1c	not normalized
	wt ND	wt HFD	ΔuORF ND	ΔuORF HFD			wt ND	wt HFD	ΔuORF ND	ΔuORF HFD
	1.67498	0.928396	0.727154	1.33817			1.5864	0.8793	0.6887	1.2674
	1.60023	1.29583	1.49517	1.72376			1.5156	1.2273	1.4161	1.6326
	0.566561	0.997026	1.1232	1.29361			0.5366	0.9443	1.0638	1.2252
	0.703609	1.15139	0.892604	1.35707			0.6664	1.0905	0.8454	1.2853
	0.491597		0.909391	1.15403			0.4656		0.8613	1.093
	0.963028						0.9121
mean	1	1.09316	1.0295	1.37333			0.947117	1.03535	0.97506	1.3007
TTEST ND/HFD		0.741823		0.0674346
TTEST wt/ΔuORF			0.91324	0.0667429
	FAS						FAS	not normalized
	wt ND	wt HFD	ΔuORF ND	ΔuORF HFD			wt ND	wt HFD	ΔuORF ND	ΔuORF HFD
	1.13705	0.342545	0.833328	0.781499			1.1452	0.345	0.8393	0.7871
	0.963693	0.631474	1.32461	1.31537			0.9706	0.636	1.3341	1.3248
	0.898262	0.276419	0.716267	0.865795			0.9047	0.2784	0.7214	0.872
	0.80503	0.518385	1.33662	0.579944			0.8108	0.5221	1.3462	0.5841
	1.08085		1.11332	0.846036			1.0886		1.1213	0.8521
	1.11511						1.1231
mean	1	0.442206	1.06483	0.877729			1.00717	0.445375	1.07246	0.88402
TTEST ND/HFD		0.000332317		0.315056
TTEST wt/ΔuORF			0.626758	0.0255805
