# Supplementary material for: Enhanced C/EBPβ function promotes hyperplastic versus hypertrophic fat tissue growth and prevents steatosis in response to high-fat diet feeding
Source: eLife. 2022 Apr 22;11:e62625. doi: 10.7554/eLife.62625 (PMC9071262; doi:10.7554/eLife.62625)
Supplement: Figure 8—source data 1. [file elife-62625-fig8-data1.xlsx]

## Sheet: Sheet1
Figure 8B							comes from
	wt ND	wt HFD	ΔuORF ND	ΔuORF HFD			wt ND				wt HFD				ΔuORF ND				ΔuORF HFD
	5.199	4.233	31.226	36.624			LAP	LIP	LAP/LIP		LAP	LIP	LAP/LIP		LAP	LIP	LAP/LIP		LAP	LIP	LAP/LIP
	7.654	4.529	48.701	52.489			8.85887e+06	1.70412e+06	5.19851		2.67974e+07	6331325	4.23251		6.08152e+06	194757	31.2262		1.87021e+07	510645	36.6244
	9.616	5.582	80.624	48.974			9.12663e+06	1.19238e+06	7.6541		1.62083e+07	3.57878e+06	4.52899		1.28253e+07	263348	48.7009		2.26211e+07	430972	52.4886
	4.989	4.997	24.334	19.827			1.53474e+07	1.59604e+06	9.61589		1.18371e+07	2.12054e+06	5.58214		1.79113e+07	222158	80.6244		2.15559e+07	440148	48.9741
	6.433	3.34	40.275	21.095			4.9517e+06	992584	4.9887		1.31182e+07	2.62499e+06	4.99742		8.9092e+06	366120	24.3341		2.20645e+07	1.11287e+06	19.8266
		3.501	28.719				8.90755e+06	1.38473e+06	6.4327		1.30166e+07	3.89681e+06	3.34033		1.19432e+07	296541	40.275		2.79565e+07	1.32527e+06	21.095
											16298584	4.65555e+06	3.50089		9.95415e+06	346606	28.7189
mean	6.7782	4.36367	42.3132	42.3132
TTEST ND/HFD		0.0209829		0.574575
TTEST wt/ΔuORF			0.00428568	0.000633659
Figure 8C	LAP cohort	normalized (mean wt ND =1)					comes from
	wt ND	wt HFD	ΔuORF ND	ΔuORF HFD			wt ND		not normalized		wt HFD		not normalized		ΔuORF ND		not normalized		ΔuORF HFD		not normalized
	1.09383	4.23064	0.68365	2.82773			LAP	GAPDH	LAP/GAPDH		LAP	GAPDH	LAP/GAPDH		LAP	GAPDH	LAP/GAPDH		LAP	GAPDH	LAP/GAPDH
	0.941771	2.12696	1.77475	2.9836			8.85887e+06	2.15605e+07	0.410884		2.67974e+07	1.68624e+07	1.58918		6.08152e+06	2.36816e+07	0.256804		1.87021e+07	17606937	1.0622
	1.65531	1.62557	2.11908	3.48051			9.12663e+06	2.57987e+07	0.353764		1.62083e+07	20286556	0.798966		1.28253e+07	1.9238e+07	0.666663		2.26211e+07	20183940	1.12075
	0.436439	1.8392	1.25841	3.84536			1.53474e+07	24682452	0.621793		1.18371e+07	19385363	0.610623		1.79113e+07	2.25015e+07	0.796005		2.15559e+07	1.64875e+07	1.30741
	0.872651	1.57394	1.4756	4.80532			4.9517e+06	3.02039e+07	0.163943		1.31182e+07	1.89878e+07	0.690872		8.9092e+06	1.88473e+07	0.472703		2.20645e+07	15275269	1.44446
		2.30926	1.15547				8.90755e+06	2.71738e+07	0.3278		1.30166e+07	2.20162e+07	0.591231		1.19432e+07	2.15468e+07	0.554291		2.79565e+07	1.54879e+07	1.80505
											16298584	1.87892e+07	0.867444		9.95415e+06	2.29338e+07	0.434038
mean	1	2.28426	1.41116	3.5885
						mean			0.375637				0.858053				0.530084				1.34797
TTEST ND/HFD		0.0260867		0.00034995		(not normalized)
TTEST wt/ΔuORF			0.18667	0.0421258
	LIP cohort	normalized (mean wt ND =1)					comes from
	wt ND	wt HFD	ΔuORF ND	ΔuORF HFD			wt ND		not normalized		wt HFD		not normalized		ΔuORF ND		not normalized		ΔuORF HFD		not normalized
	1.44367	6.85811	0.150214	0.529742			LIP	GAPDH	LIP/GAPDH		LIP	GAPDH	LIP/GAPDH		LIP	GAPDH	LIP/GAPDH		LIP	GAPDH	LIP/GAPDH
	0.844205	3.22223	0.250033	0.390007			1.70412e+06	2.15605e+07	0.0790388		6331325	1.68624e+07	0.37547		194757	2.36816e+07	0.00822399		510645	17606937	0.0290025
	1.1811	1.99802	0.180334	0.48761			1.19238e+06	2.57987e+07	0.0462188		3.57878e+06	20286556	0.176412		263348	1.9238e+07	0.0136889		430972	20183940	0.0213522
	0.600251	2.52511	0.354815	1.33072			1.59604e+06	24682452	0.0646631		2.12054e+06	19385363	0.109389		222158	2.25015e+07	0.009873		440148	1.64875e+07	0.0266958
	0.930774	3.23293	0.25138	1.56293			992584	3.02039e+07	0.0328628		2.62499e+06	1.89878e+07	0.138246		366120	1.88473e+07	0.0194255		1.11287e+06	15275269	0.0728546
		4.52576	0.276051				1.38473e+06	2.71738e+07	0.0509583		3.89681e+06	2.20162e+07	0.176998		296541	2.15468e+07	0.0137627		1.32527e+06	1.54879e+07	0.085568
											4.65555e+06	1.87892e+07	0.247778		346606	2.29338e+07	0.0151133
mean	1	3.72703	0.243805	0.860201
						mean			0.0547484				0.204049				0.0133479				0.0470946
TTEST ND/HFD		0.00787708		0.0215567		(not normalized)
TTEST wt/ΔuORF			0.000326783	0.00682629
Figure 8E							comes from
	wt ND	wt HFD	ΔuORF ND	ΔuORF HFD			wt ND				wt HFD				ΔuORF ND				ΔuORF HFD
	5.7987	2.9442	19.3176	22.9076			LAP	LIP	LAP/LIP		LAP	LIP	LAP/LIP		LAP	LIP	LAP/LIP		LAP	LIP	LAP/LIP
	5.0794	5.3771	10.0605	13.1486			21380550	3687127	5.7987		25320430	8600095	2.9442		41771101	2162331	19.3176		32452640	1416678	22.9076
	4.3797	6.3626	22.0869	10.9107			25591601	5038296	5.07942		30798567	5727727	5.3771		19649218	1953100	10.0605		32062598	2438476	13.1486
	4.4497	2.1011	12.9231	18.004			24615606	5620343	4.37973		26042015	4092996	6.36258		24004887	1086840	22.0869		17656234	1618256	10.9107
	4.632		16.6173	18.4581			17279743	3883342	4.44971		4060215	1932441	2.10108		26404135	2043182	12.923		44513357	2472420	18.004
	5.508		18.9295	22.8943			15262126	3294904	4.63204						28432075	1710995	16.6173		60447877	3274875	18.4581
	4.9978						22312886	4050878	5.50816						44169029	2333345	18.9295		47063778	2055697	22.8943
	5.3434						23151672	4632419	4.99775
							24094531	4509185	5.34343
mean	5.02359	4.19625	16.6558	17.7205
TTEST ND/HFD		0.278237		0.702923
TTEST wt/ΔuORF			8.01796e-06	0.000899822
Figure 8F	LAP cohort	normalized (mean wt ND =1)					comes from
	wt ND	wt HFD	kiki ND	kiki HFD			wt ND		not normalized		wt HFD		not normalized		ΔuORF ND		not normalized		ΔuORF HFD		not normalized
	0.862077	1.52399	2.20178	2.34148			LAP	GAPDH	LAP/GAPDH		LAP	GAPDH	LAP/GAPDH		LAP	GAPDH	LAP/GAPDH		LAP	GAPDH	LAP/GAPDH
	0.983295	1.98663	1.20941	2.3001			21380550	40854760	0.523331		25320430	2.73689e+07	0.925152		41771101	3.12516e+07	1.33661		32452640	2.28313e+07	1.42141
	1.05391	1.60111	1.3664	1.36337			25591601	4.2873e+07	0.596917		30798567	2.55378e+07	1.206		19649218	26763403	0.734182		32062598	22962592	1.3963
	0.745811	0.233823	1.40686	3.0204			24615606	3.84747e+07	0.639788		26042015	2.67931e+07	0.971967		24004887	2.89395e+07	0.829486		17656234	2.1333e+07	0.827648
	0.766934		1.71783	4.37624			17279743	3.81661e+07	0.452751		4060215	2.86043e+07	0.141944		26404135	3.09165e+07	0.854048		44513357	2.42771e+07	1.83356
	1.18983		2.44009	3.15172			15262126	3.27813e+07	0.465574						28432075	27264581	1.04282		60447877	2.27536e+07	2.65663
	1.17657						22312886	3.08915e+07	0.722298						44169029	2.98183e+07	1.48128		47063778	2.45985e+07	1.91328
	1.22157						23151672	3.24142e+07	0.714245
							24094531	3.24915e+07	0.741563
mean	1	1.33639	1.72373	2.75889
						mean			0.607058				0.811266				1.0464				1.6748
TTEST ND/HFD		0.247582		0.0489794		(not normalized)
TTEST wt/ΔuORF			0.0025264	0.0452174
	LIP cohort	normalized (mean wt ND =1)					comes from
	wt ND	wt HFD	kiki ND	kiki HFD			wt ND		not normalized		wt HFD		not normalized		ΔuORF ND		not normalized		ΔuORF HFD		not normalized
	0.745148	2.59443	0.571278	0.512317			LIP	GAPDH	LIP/GAPDH		LIP	GAPDH	LIP/GAPDH		LIP	GAPDH	LIP/GAPDH		LIP	GAPDH	LIP/GAPDH
	0.97028	1.85181	0.602532	0.876788			3687127	40854760	0.0902496		8600095	2.73689e+07	0.314228		2162331	3.12516e+07	0.0691912		1416678	2.28313e+07	0.06205
	1.2061	1.26129	0.310079	0.626313			5038296	4.2873e+07	0.117517		5727727	2.55378e+07	0.224285		1953100	26763403	0.0729765		2438476	22962592	0.106193
	0.840087	0.557792	0.54565	0.840859			5620343	3.84747e+07	0.146079		4092996	2.67931e+07	0.152763		1086840	2.89395e+07	0.0375556		1618256	2.1333e+07	0.0758568
	0.829876		0.51814	1.18834			3883342	3.81661e+07	0.101748		1932441	2.86043e+07	0.0675578		2043182	3.09165e+07	0.0660872		2472420	2.42771e+07	0.101842
	1.0827		0.646091	0.689998			3294904	3.27813e+07	0.100512						1710995	27264581	0.0627552		3274875	2.27536e+07	0.143928
	1.17997						4050878	3.08915e+07	0.131132						2333345	2.98183e+07	0.0782522		2055697	2.45985e+07	0.08357
	1.14584						4632419	3.24142e+07	0.142913
							4509185	3.24915e+07	0.13878
mean	1	1.56633	0.532295	0.789103
						mean			0.121116				0.189708				0.0644697				0.0955733
TTEST ND/HFD		0.0925045		0.0391897		(not normalized)
TTEST wt/ΔuORF			0.000126352	0.0647236
