# Supplementary figures and images for: Enhanced C/EBPβ function promotes hyperplastic versus hypertrophic fat tissue growth and prevents steatosis in response to high-fat diet feeding
Source: eLife journal article supplement (doi:10.7554/elife.62625), 2022-04-22

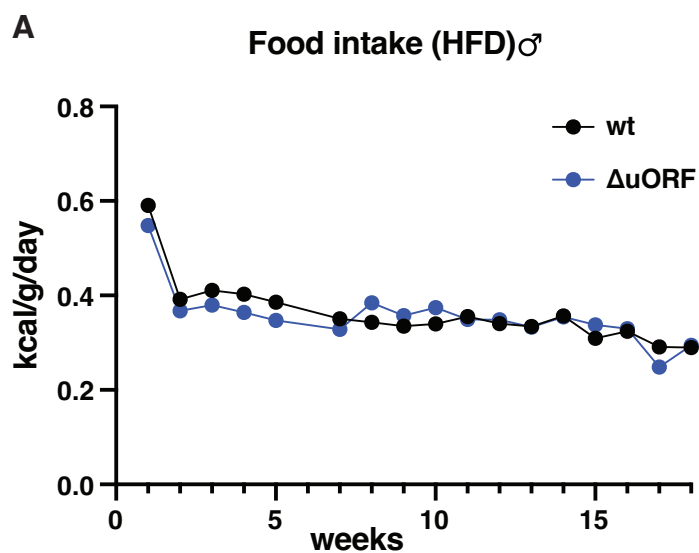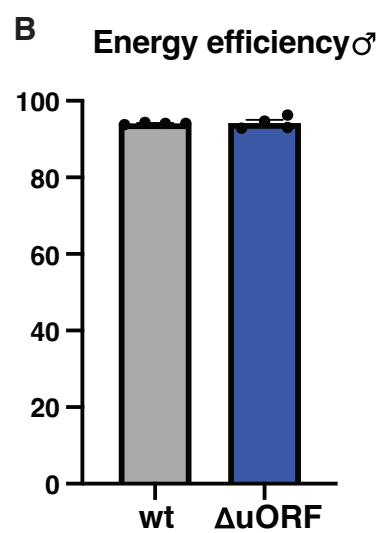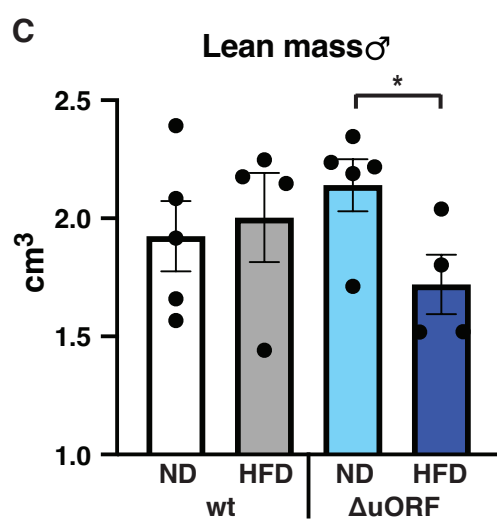

Supplement: supp [file elife_poa_e62625_Figure_1_figure_supplement_1.pdf › elife_poa_e62625_Figure_1_figure_supplement_1.pdf]

**A**

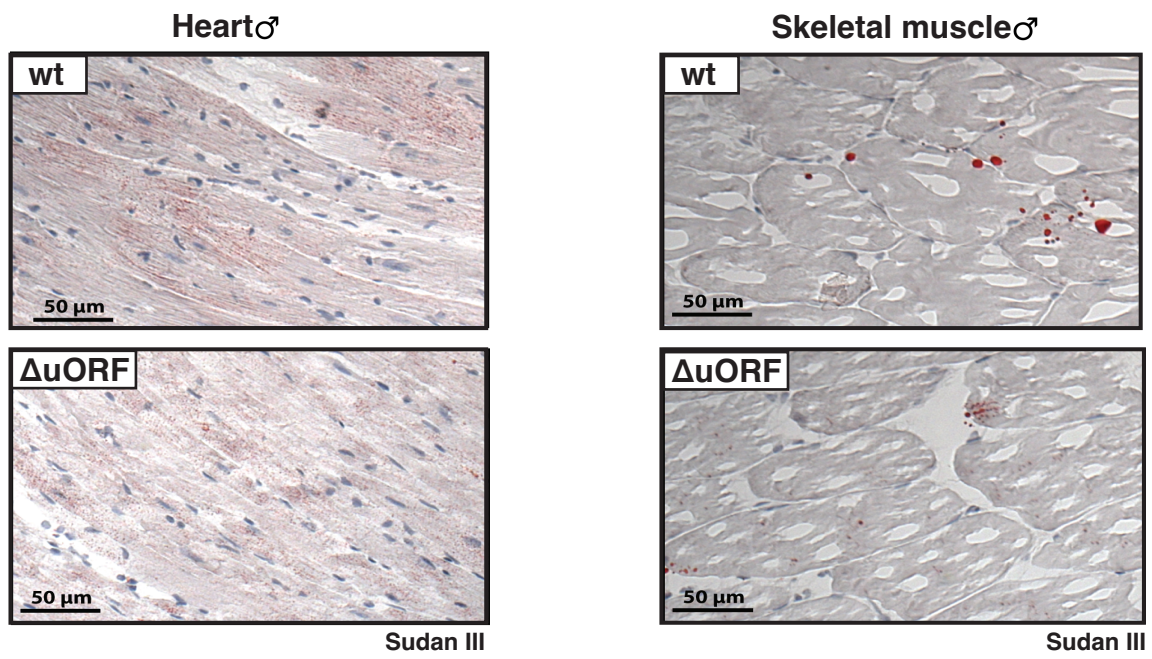

**B**

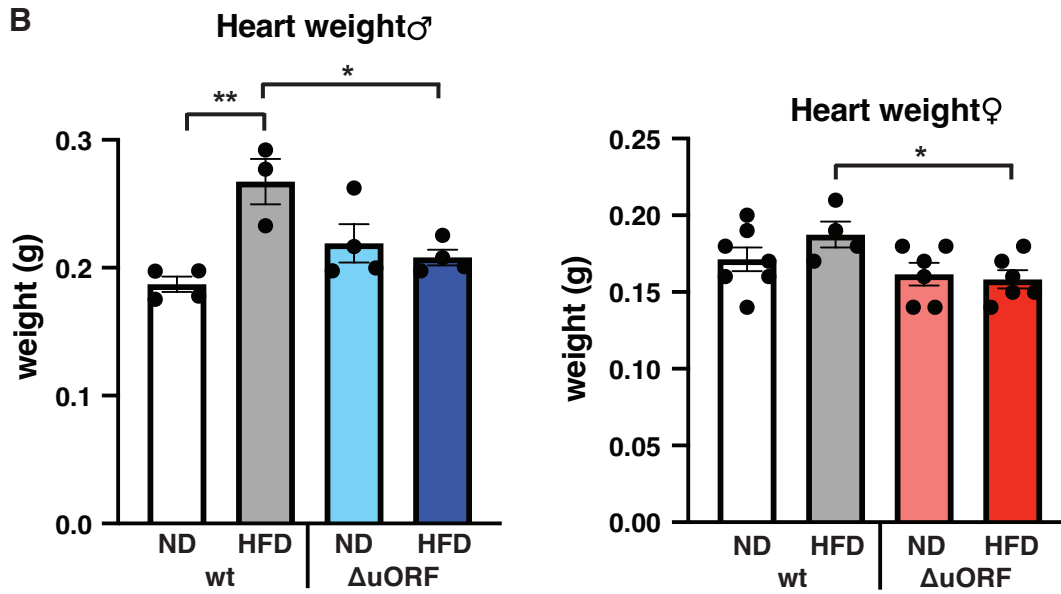

Supplement: supp [file elife_poa_e62625_Figure_5_figure_supplement_1.pdf › elife_poa_e62625_Figure_5_figure_supplement_1.pdf]

**A**

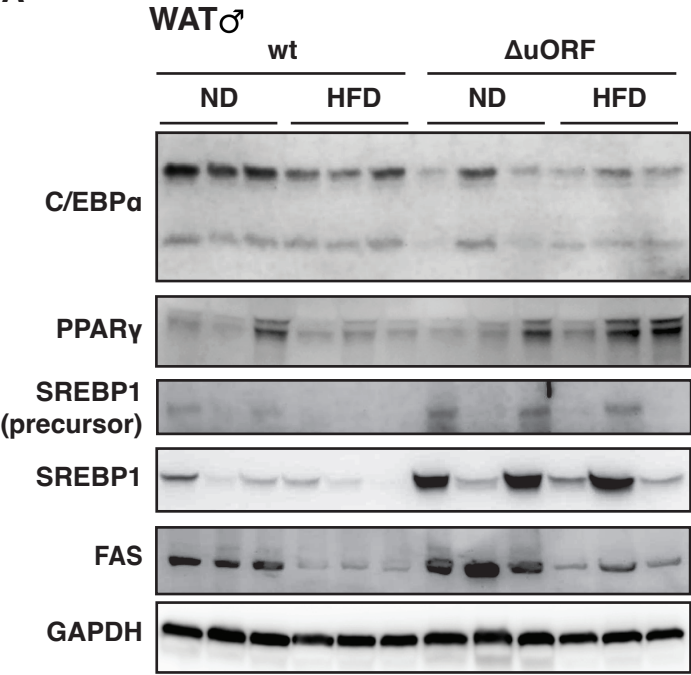

**B**

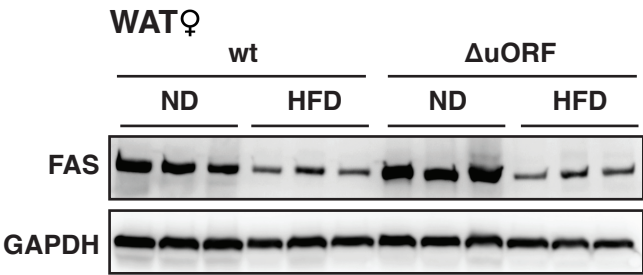

Supplement: supp [file elife_poa_e62625_Figure_7_figure_supplement_1.pdf › elife_poa_e62625_Figure_7_figure_supplement_1.pdf]
